# Supplementary material for: Young people's experiences of persistent musculoskeletal pain, needs, gaps and perceptions about the role of digital technologies to support their co-care: a qualitative study
Source: PubMed Central journal article supplement — BMJ Open. 2016 Dec 9;6(12):e014007. doi: 10.1136/bmjopen-2016-014007 (PMC5168607; doi:10.1136/bmjopen-2016-014007), 2016-12-09
Supplement: bmjopen-2016-014007supp1.pdf [file bmjopen-2016-014007supp1.pdf]

Consolidated criteria for reporting qualitative studies (COREQ): 32-item checklist [1].

| No. Item                                       | Guide questions/description                                                                                                                              | Addressed in manuscript / response                                                                                                                                                                                                                                                                                               |
|------------------------------------------------|----------------------------------------------------------------------------------------------------------------------------------------------------------|----------------------------------------------------------------------------------------------------------------------------------------------------------------------------------------------------------------------------------------------------------------------------------------------------------------------------------|
| <b>Domain 1: Research team and reflexivity</b> |                                                                                                                                                          |                                                                                                                                                                                                                                                                                                                                  |
| <i>Personal Characteristics</i>                |                                                                                                                                                          |                                                                                                                                                                                                                                                                                                                                  |
| 1. Inter viewer/facilitator                    | Which author/s conducted the interview or focus group?                                                                                                   | Reported in "Methods"                                                                                                                                                                                                                                                                                                            |
| 2. Credentials                                 | What were the researcher's credentials? E.g. PhD, MD                                                                                                     | PhD for both; noted on title page                                                                                                                                                                                                                                                                                                |
| 3. Occupation                                  | What was their occupation at the time of the study?                                                                                                      | Reported in "Data collection"                                                                                                                                                                                                                                                                                                    |
| 4. Gender                                      | Was the researcher male or female?                                                                                                                       | Reported on Title Page                                                                                                                                                                                                                                                                                                           |
| 5. Experience and training                     | What experience or training did the researcher have?                                                                                                     | Reported in "Methods"                                                                                                                                                                                                                                                                                                            |
| <i>Relationship with participants</i>          |                                                                                                                                                          |                                                                                                                                                                                                                                                                                                                                  |
| 6. Relationship established                    | Was a relationship established prior to study commencement?                                                                                              | Reported in "Methods"                                                                                                                                                                                                                                                                                                            |
| 7. Participant knowledge of the interviewer    | What did the participants know about the researcher? e.g. personal goals, reasons for doing the research                                                 | All participants were provided with a detailed Participant Information Statement that outlined the study team, the background to the study, aims, and requirements for participation. Participants were also briefed about the interviewers' background in phone contact prior to the scheduled interview. Reported in "Methods" |
| 8. Interviewer characteristics                 | What characteristics were reported about the interviewer/facilitator? e.g. Bias, assumptions, reasons and interests in the research topic                | Reported in "Methods"                                                                                                                                                                                                                                                                                                            |
| <b>Domain 2: study design</b>                  |                                                                                                                                                          |                                                                                                                                                                                                                                                                                                                                  |
| <i>Theoretical framework</i>                   |                                                                                                                                                          |                                                                                                                                                                                                                                                                                                                                  |
| 9. Methodological orientation and Theory       | What methodological orientation was stated to underpin the study? e.g. grounded theory, discourse analysis, ethnography, phenomenology, content analysis | Reported in "Methods and Data analysis"                                                                                                                                                                                                                                                                                          |

|                                        |                                                                                    |                                                                                                                                                             |
|----------------------------------------|------------------------------------------------------------------------------------|-------------------------------------------------------------------------------------------------------------------------------------------------------------|
| <i>Participant selection</i>           |                                                                                    |                                                                                                                                                             |
| 10. Sampling                           | How were participants selected? e.g. purposive, convenience, consecutive, snowball | Reported in methods: "Recruitment and sampling"                                                                                                             |
| 11. Method of approach                 | How were participants approached? e.g. face-to-face, telephone, mail, email        | Reported in "Recruitment and sampling"                                                                                                                      |
| 12. Sample size                        | How many participants were in the study?                                           | N=23                                                                                                                                                        |
| 13. Non-participation                  | How many people refused to participate or dropped out? Reasons?                    | Reported in "Methods". Five people who were invited to take part declined to do so. Reasons were unclear as they did not respond to phone contact or email. |
| <i>Setting</i>                         |                                                                                    |                                                                                                                                                             |
| 14. Setting of data collection         | Where was the data collected? e.g. home, clinic, workplace                         | Reported in "Methods"                                                                                                                                       |
| 15. Presence of nonparticipants        | Was anyone else present besides the participants and researchers?                  | No. Reported in "Methods"                                                                                                                                   |
| 16. Description of sample              | What are the important characteristics of the sample? e.g. demographic data, date  | Reported in "Methods"                                                                                                                                       |
| <i>Data collection</i>                 |                                                                                    |                                                                                                                                                             |
| 17. Interview guide                    | Were questions, prompts, guides provided by the authors? Was it pilot tested?      | Reported in "Methods". The interview schedule is provided as a supplemental file 2                                                                          |
| 18. Repeat interviews                  | Were repeat interviews carried out? If yes, how many?                              | No                                                                                                                                                          |
| 19. Audio/visual recording             | Did the research use audio or visual recording to collect the data?                | Reported in "Methods"                                                                                                                                       |
| 20. Field notes                        | Were field notes made during and/or after the interview or focus group?            | No                                                                                                                                                          |
| 21. Duration                           | What was the duration of the interviews or focus group?                            | Reported in "Methods"                                                                                                                                       |
| 22. Data saturation                    | Was data saturation discussed?                                                     | Reported in "Data Analysis"                                                                                                                                 |
| 23. Transcripts returned               | Were transcripts returned to participants for comment and/or correction?           | Yes. Reported in "Data Analysis"                                                                                                                            |
| <b>Domain 3: analysis and findings</b> |                                                                                    |                                                                                                                                                             |
| <i>Data analysis</i>                   |                                                                                    |                                                                                                                                                             |

|                                    |                                                                                                                                 |                                                                            |
|------------------------------------|---------------------------------------------------------------------------------------------------------------------------------|----------------------------------------------------------------------------|
| 24. Number of data coders          | How many data coders coded the data?                                                                                            | Reported in "Data analysis"                                                |
| 25. Description of the coding tree | Did authors provide a description of the coding tree?                                                                           | No                                                                         |
| 26. Derivation of themes           | Were themes identified in advance or derived from the data?                                                                     | Themes were derived inductively from the data. Reported in "Data analysis" |
| 27. Software                       | What software, if applicable, was used to manage the data?                                                                      | No                                                                         |
| 28. Participant checking           | Did participants provide feedback on the findings?                                                                              | Yes.                                                                       |
| <i>Reporting</i>                   |                                                                                                                                 |                                                                            |
| 29. Quotations presented           | Were participant quotations presented to illustrate the themes/findings? Was each quotation identified? e.g. participant number | Yes. Reported in "Results" And Supplemental file 3                         |
| 30. Data and findings consistent   | Was there consistency between the data presented and the findings?                                                              | Yes                                                                        |
| 31. Clarity of major themes        | Were major themes clearly presented in the findings?                                                                            | Yes                                                                        |
| 32. Clarity of minor themes        | Is there a description of diverse cases or discussion of minor themes?                                                          | Yes                                                                        |

1. Tong A, Sainsbury P, Craig J. Consolidated criteria for reporting qualitative research (COREQ): a 32-item checklist for interviews and focus groups. *Int J Qual Health Care.* 2007;19(6):349-57.
